# Supplementary material
Source: Springer Nature journal article supplement (https://www.springermedizin.de/resource/supplementary/12885_2008_1196_MOESM3_ESM.pdf/9471370)

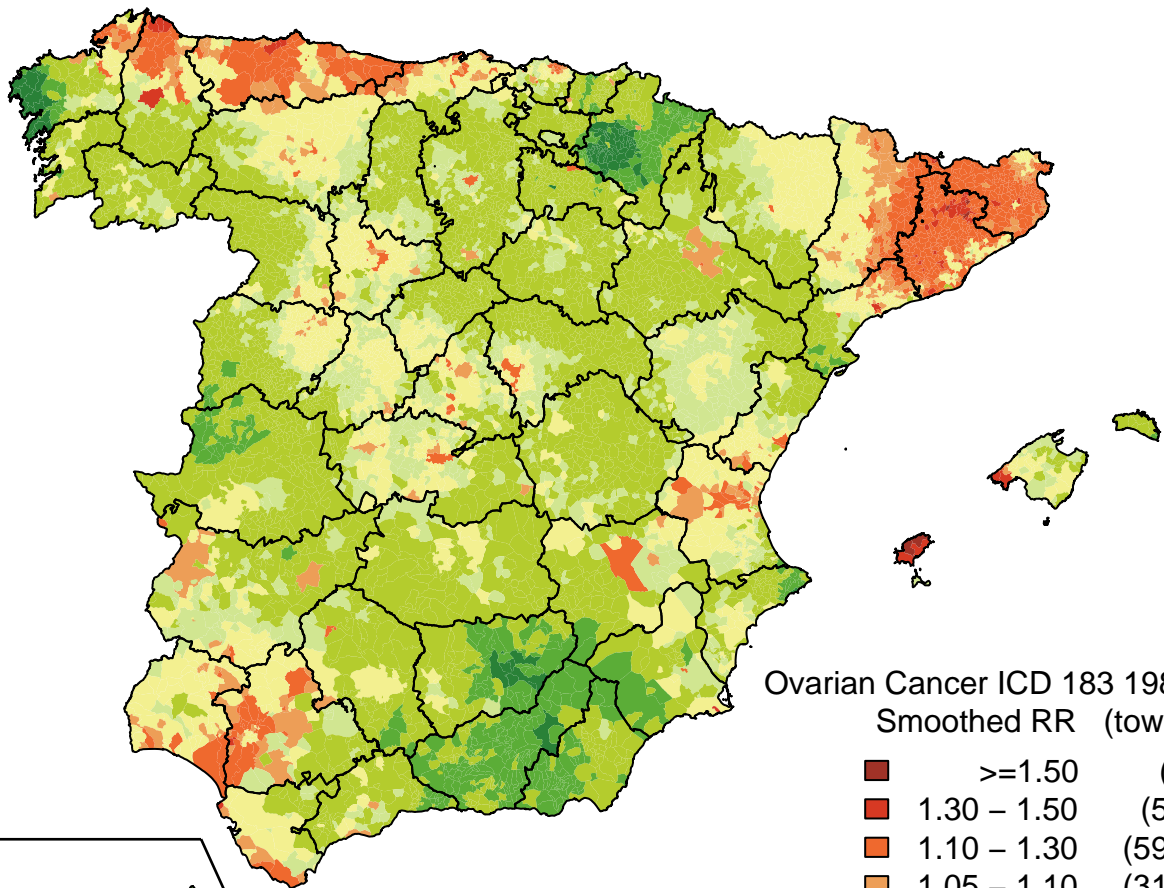

Ovarian Cancer ICD 183 1989–1998

Smoothed RR (towns)

|                                                                                       |             |        |
|---------------------------------------------------------------------------------------|-------------|--------|
|    | $\geq 1.50$ | (9)    |
|    | 1.30 – 1.50 | (55)   |
|    | 1.10 – 1.30 | (593)  |
|    | 1.05 – 1.10 | (318)  |
|    | 0.95 – 1.05 | (1723) |
|   | 0.91 – 0.95 | (1370) |
|  | 0.77 – 0.91 | (3533) |
|  | 0.67 – 0.77 | (468)  |
|  | $< 0.67$    | (136)  |

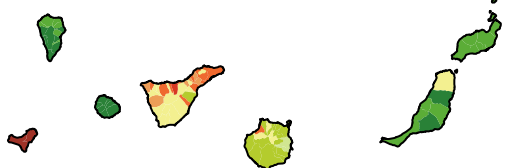

Supplement: MOESM3 [file 9471370]
